# Supplementary material
Source: PubMed Central journal article supplement (PMC7326328)
Supplement: NIHMS1598387-supplement-Supporting_Figures.pdf [file NIHMS1598387-supplement-Supporting_Figures.pdf]

## Supplementary Materials for

### **Biofuel-powered soft electronic skin with multiplexed and wireless sensing for human-machine interfaces**

You Yu, Joanna Nassar, Changhao Xu, Jihong Min, Yiran Yang, Adam Dai, Rohan Doshi, Adrian Huang, Yu Song, Rachel Gehlhar, Aaron D. Ames, Wei Gao\*

\*Corresponding author. Email: weigao@caltech.edu

Published 22 April 2020, *Sci. Robot.* **5**, eaaz7946 (2019)  
DOI: 10.1126/scirobotics.aaz7946

#### **The PDF file includes:**

- Fig. S1. CVs of an MDB-CNT/rGO/h-Ni electrode.
- Fig. S2. Characterization of the surface area of the BFC anodes.
- Fig. S3. Role of MDB in the preparation of the Pt/CNT BFC cathodes.
- Fig. S4. Characterization of the Pt/CNT and the Pt/MDB-CNT cathodes.
- Fig. S5. Characterization of the bulk Pt, Pt/MDB-CNT, and Pt alloy/MDB-CNT cathodes.
- Fig. S6. LSV characterization of the bioanode and the cathodes in lactate solutions.
- Fig. S7. Characterization of the stability of the Pt/MDB-CNT cathode.
- Fig. S8. Characterization of the Pt-Co alloy nanoparticles.
- Fig. S9. Schematic diagram of the energy-harvesting circuit.
- Fig. S10. Schematic illustration and component list of the electronic system of the PPES.
- Fig. S11. Fabrication process of the electrochemical patch of the PPES.
- Fig. S12. Exploded view of the multilayered electronic patch.
- Fig. S13. Fabrication process of the flexible electronic patch of the PPES.
- Fig. S14. Assembly and encapsulation of the PPES.
- Fig. S15. Mechanical deformation study of the BFC patch.
- Fig. S16. Mechanical deformation study of the electronic patch.
- Fig. S17. Power consumption breakdown of the PPES.
- Fig. S18. Continuous operation of the PPES with small capacitors in 5 to 20 mM lactate.
- Fig. S19. Long-term stability of the BFCs to charge a capacitor.
- Fig. S20. Selectivity of the sensor arrays.
- Fig. S21. Interactive study of the urea/ $\text{NH}_4^+$  sensor array.
- Fig. S22. Interactive study of the glucose/pH sensor array.
- Fig. S23. Stability of the sensor arrays.
- Fig. S24. Performance of the sensor arrays under mechanical deformation.
- Fig. S25. Influence of the temperature on the performance of enzymatic sensors.
- Fig. S26. Skin-interfaced microfluidic patch in the PPES.
- Fig. S27. Investigation of the stability, reusability, and biocompatibility of the PPES.

Fig. S28. Operation flow of data transmission processes and human-machine interaction.  
Fig. S29. Schematic illustration and component list of the strain sensor integrated PPES for human-machine interaction.  
Text S1. Mechanism of TTF-MDB bimediator in BFC.  
Table S1. List of BFCs for energy-harvesting in body fluids.  
References (51–55)

**Other Supplementary Material for this manuscript includes the following:**

(available at [robotics.sciencemag.org/cgi/content/full/5/41/eaaz7946/DC1](http://robotics.sciencemag.org/cgi/content/full/5/41/eaaz7946/DC1))

Movie S1 (.mp4 format). Biofuel-powered electronic skin for robotic arm control and cargo handling.

Movie S2 (.mp4 format). Biofuel-powered electronic skin for prosthesis control.

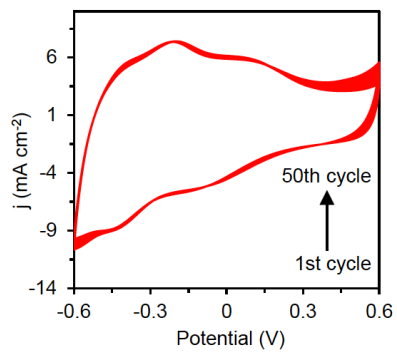

**Fig. S1. CVs of an MDB-CNT/rGO/h-Ni electrode. Scan rate,  $50 \text{ mV s}^{-1}$ .**

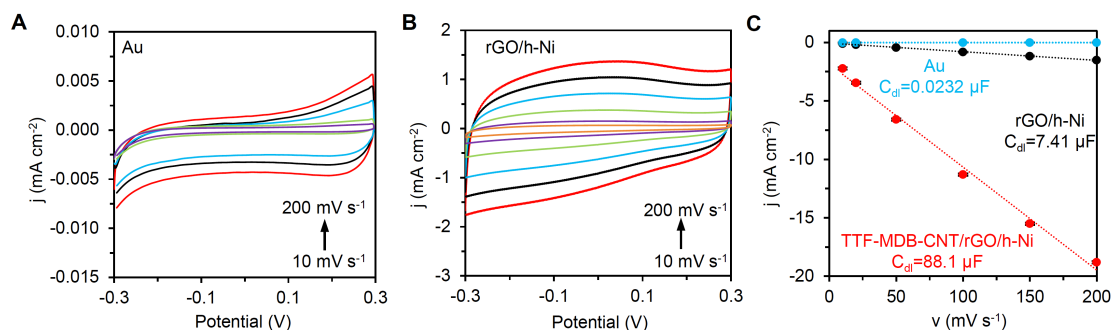

**Fig. S2. Characterization of the surface area of the BFC anodes.** (A and B) CVs of a Au electrode (A) and an rGO/h-Ni electrode (B). Scan rate range: 10 mV s<sup>-1</sup>–200 mV s<sup>-1</sup>. (C) Current densities of the Au, rGO/h-Ni, and TTF-MDB-CNT/rGO/h-Ni electrodes at -0.1 V plotted against scan rate ( $v$ ). Error bars represent the SDs from five scan cycles.  $C_{dl}$ , the double-layer capacitance per square centimeter.  $C_{dl}$  is calculated as the slope of the linear fitting.

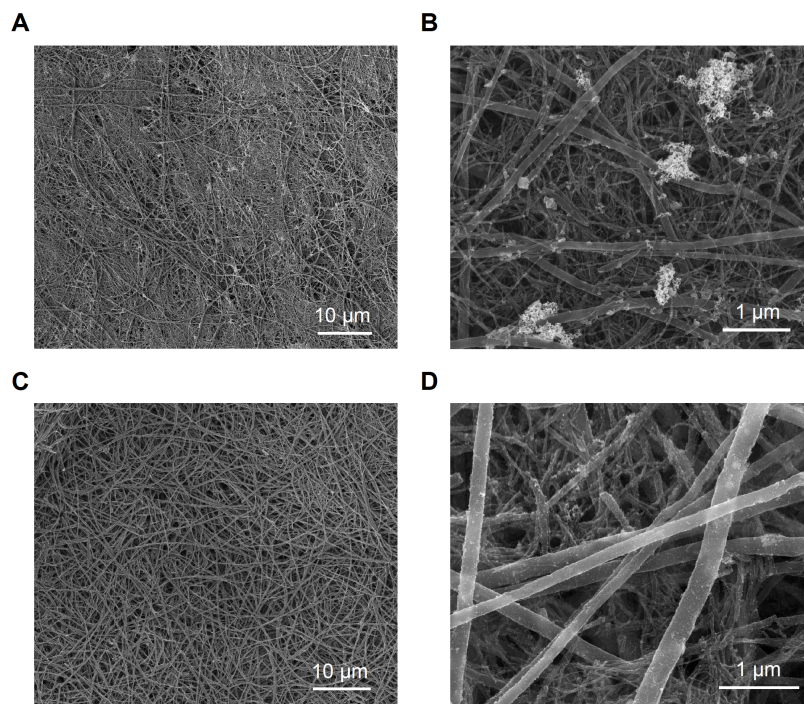

**Fig. S3. Role of MDB in the preparation of the Pt/CNT BFC cathodes.** SEM images of the Pt/CNT (A and B) and Pt/MDB-CNT (C and D) electrodes.

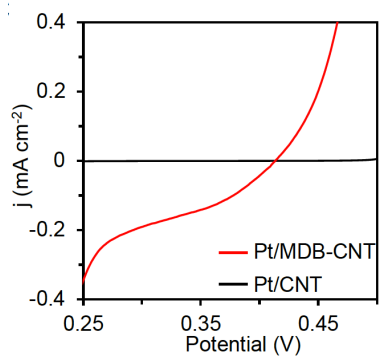

**Fig. S4. Characterization of the Pt/CNT and the Pt/MDB-CNT cathodes.** The linear sweeping voltammograms (LSVs) suggest high performance of the Pt/MDB-CNT electrode for O<sub>2</sub> reduction. Experiments were repeated three times independently with similar results.

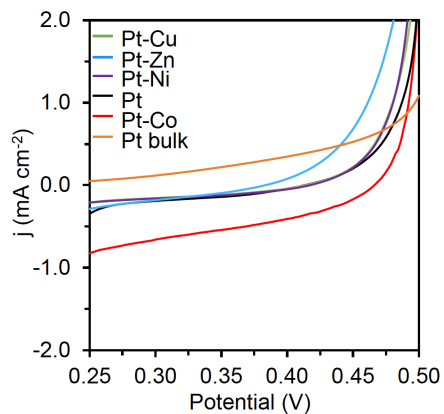

**Fig. S5. Characterization of the bulk Pt, Pt/MDB-CNT, and Pt alloy/MDB-CNT cathodes.** Linear sweeping voltammograms (LSVs) of bulk Pt electrode, Pt/MDB-CNT, Pt-M/MDB-CNT (M=Co, Ni, Zn, or Cu). Scan rate,  $5 \text{ mV s}^{-1}$ . Experiments were repeated three times independently with similar results.

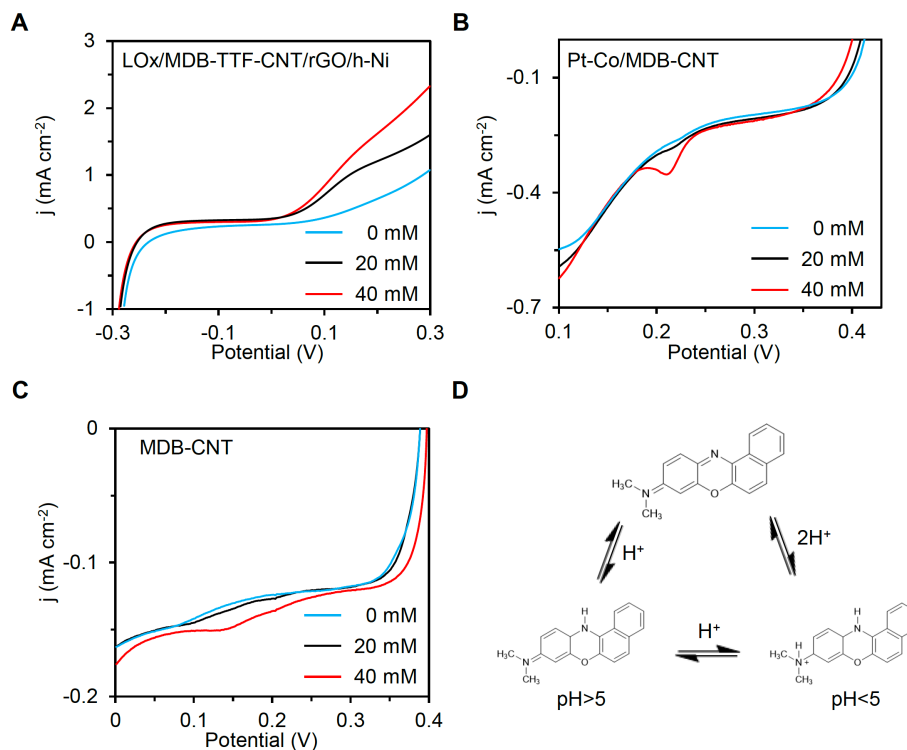

**Fig. S6. LSV characterization of the bioanode and the cathodes in lactate solutions. (A to C)** LSVs of the LOx/TTF-MDB-CNT/rGO/h-Ni (A), Pt-Co/MDB-CNT (B), and MDB-CNT (C) electrodes in 0, 20 and 40 mM lactate solutions. Scan rate, 5 mV s<sup>-1</sup>. (D) The forms of the MDB under different pHs. Experiments were repeated three times independently with similar results.



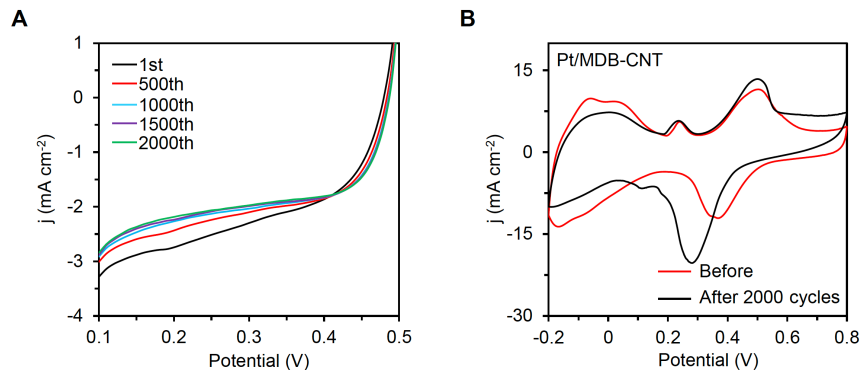

**Fig. S7. Characterization of the stability of the Pt/MDB-CNT cathode.** (A) Repetitive LSVs of a Pt/MDB-CNT cathode for over 2000 cycles. Current density of the Pt/MDB-CNT cathode shows significant decrease over time. (B) CVs of a Pt/MDB-CNT cathode before and after 2000 cycles catalysis recorded in  $\text{N}_2$ -purged 0.1 M  $\text{H}_2\text{SO}_4$  solutions. Scan rate,  $100 \text{ mV s}^{-1}$ . The ECSA of the cathode, characterized by the adsorption/desorption of hydrogen on Pt (integral area in the range of -0.2 to 0.1 V), decreases significantly after 2000 cycles. Experiments were repeated three times independently with similar results.

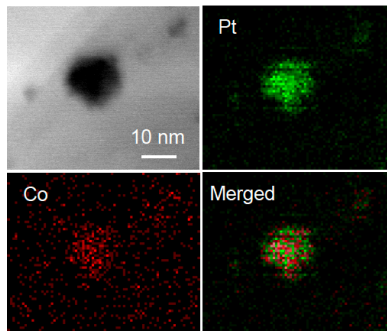

**Fig. S8. Characterization of the Pt-Co alloy nanoparticles.** Scanning transmission electron microscope (STEM) image of a Pt-Co alloy nanoparticle and the corresponding elemental mappings of Pt and Co.

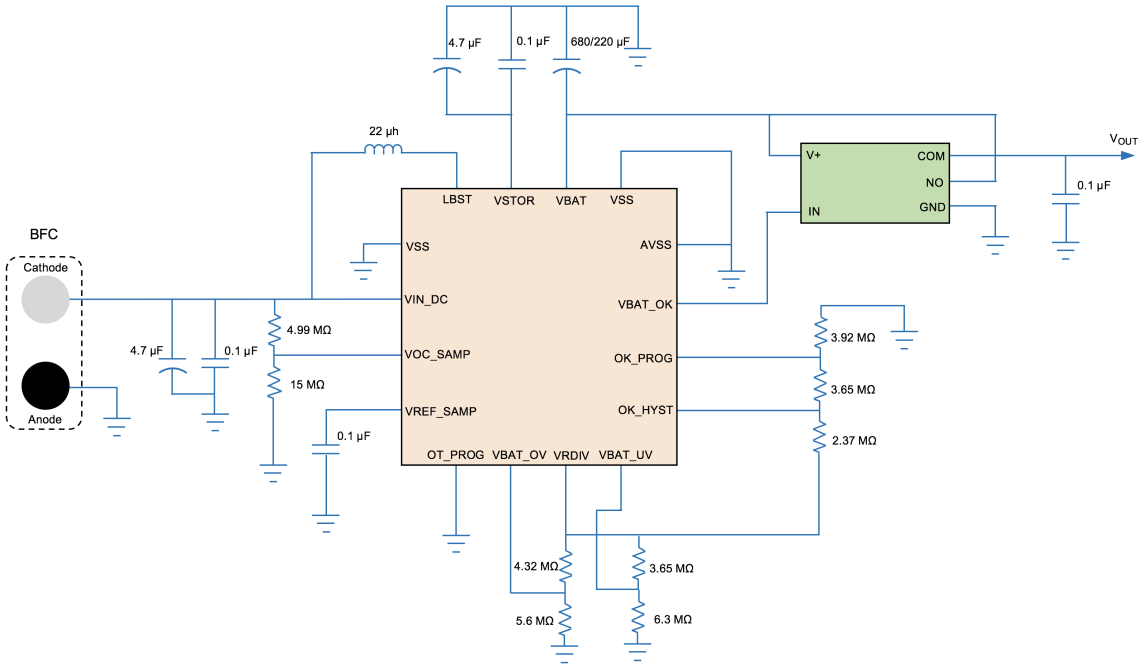

**Fig. S9. Schematic diagram of the energy-harvesting circuit.**

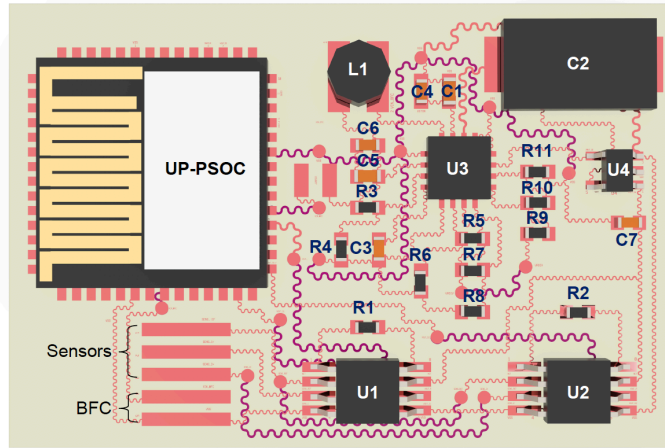

The list of the components.

| Components | Description               | Value and series number |
|------------|---------------------------|-------------------------|
| UP-PSOC    | EZ-BLE™ Creator Module    | CYBLE-214009-00         |
| U1         | Instrumentation Amplifier | INA 333                 |
| U2         | Instrumentation Amplifier | INA 333                 |
| U3         | Boost Converter           | BQ25504                 |
| U4         | Analogue Switch           | MAX4715EXK+T            |
| L1         | Fixed Inductors           | WE-TPC 2828             |
| C1         | 0402 Capacitor            | 4.7 $\mu$ F             |
| C2         | Tantalum Capacitors       | 680 $\mu$ F             |
| C3         | 0402 Capacitor            | 0.01 $\mu$ F            |
| C4         | 0402 Capacitor            | 0.1 $\mu$ F             |
| C5         | 0402 Capacitor            | 4.7 $\mu$ F             |
| C6         | 0402 Capacitor            | 0.1 $\mu$ F             |
| C7         | 0402 Capacitor            | 0.1 $\mu$ F             |
| R1         | 0402 Resistor             | $\infty$                |
| R2         | 0402 Resistor             | $\infty$                |
| R3         | 0402 Resistor             | 4.99 M $\Omega$         |
| R4         | 0402 Resistor             | 15 M $\Omega$           |
| R5         | 0402 Resistor             | 4.32 M $\Omega$         |
| R6         | 0402 Resistor             | 5.6 M $\Omega$          |
| R7         | 0402 Resistor             | 3.65 M $\Omega$         |
| R8         | 0402 Resistor             | 6.2 M $\Omega$          |
| R9         | 0402 Resistor             | 2.37 M $\Omega$         |
| R10        | 0402 Resistor             | 3.65 M $\Omega$         |
| R11        | 0402 Resistor             | 3.92 M $\Omega$         |

**Fig. S10. Schematic illustration and component list of the electronic system of the PPES. R1 and R2 are the gain resistors ( $R_g$ ). The gain  $G=1+(100k\Omega/R_g)$ .**

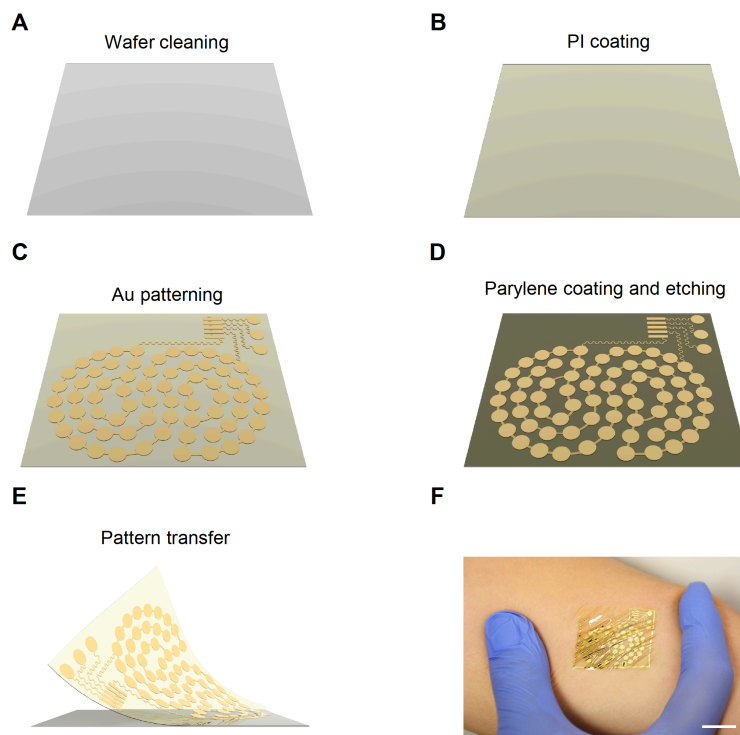

**Fig. S11. Fabrication process of the electrochemical patch of the PPES.** (A) Wafer cleaning. (B) Spin-coating of PI (9  $\mu\text{m}$ ) on the handling wafer. (C) Electrode patterning using photolithography, electron-beam evaporation and lift-off in acetone. (D) Parylene insulating layer patterning. (E) BFC-sensor patch release from the wafer. (F) Photograph of a soft electrochemical BFC-sensor patch on the skin. Scale bar, 2 cm.

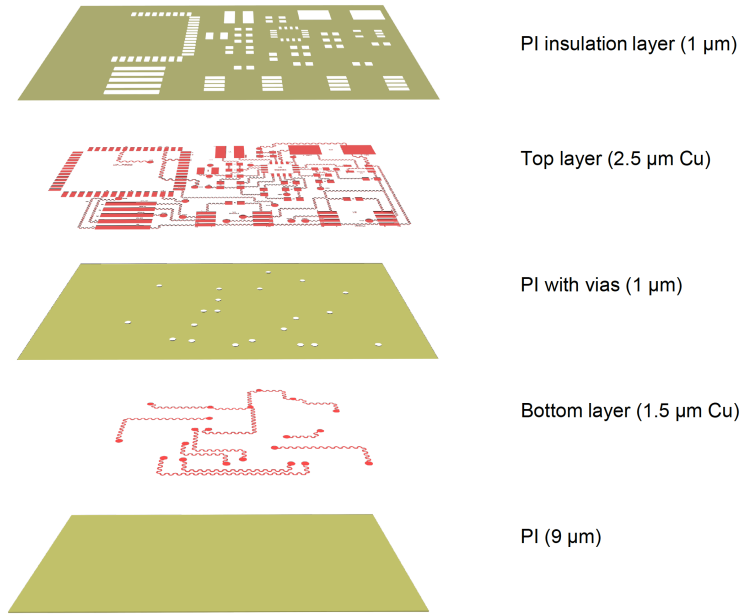

**Fig. S12. Exploded view of the multilayered electronic patch.**

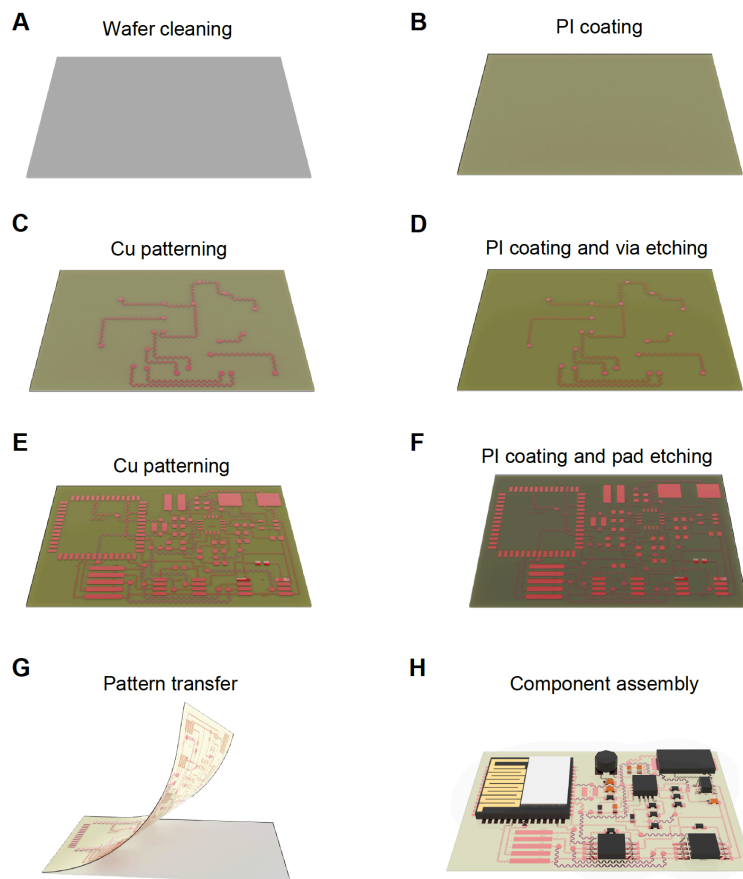

**Fig. S13. Fabrication process of the flexible electronic patch of the PPES.** (A) Wafer cleaning. (B) Spin-coating of PI (9  $\mu\text{m}$ ) on the handling wafer. (C) Cu patterning (1.5  $\mu\text{m}$ ) using photolithography, electron-beam evaporation, and lift-off. (D) Insulating PI layer (1  $\mu\text{m}$ ) coating and via etching. (E) Cu patterning using photolithography, electron-beam evaporation (2.5  $\mu\text{m}$ ) and lift-off in acetone. (F) Insulating PI layer (1  $\mu\text{m}$ ) coating and selective etching of the connecting pads. (G) Patch release from the wafer. (H) Assembling of the electronic components on the soft electronic patch.

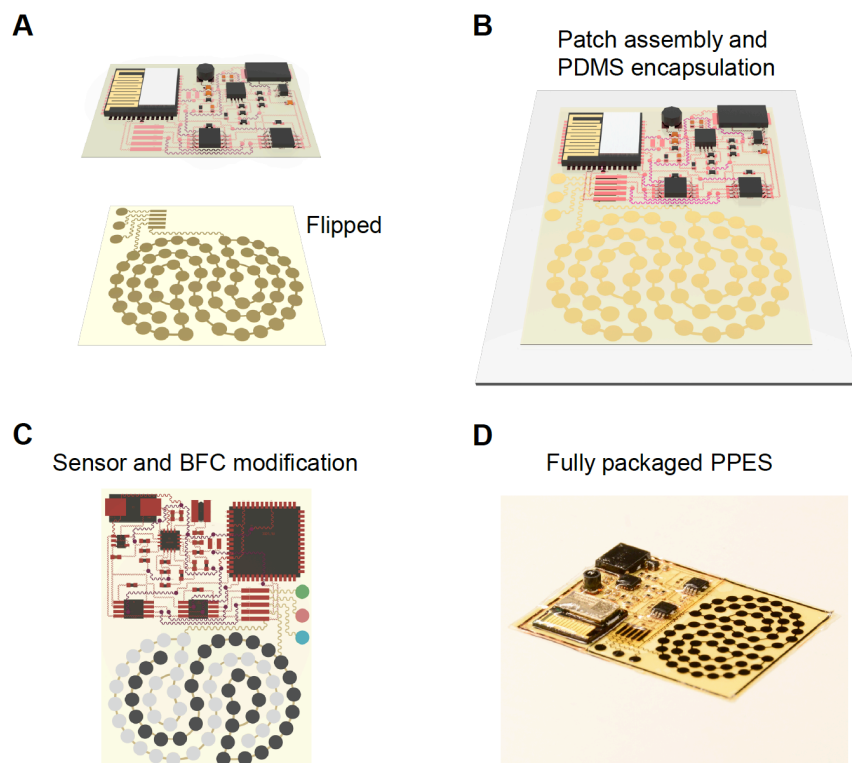

**Fig. S14. Assembly and encapsulation of the PPES.** (A) The flipped electrochemical and the electronic patches. (B) The flipped electrochemical patch and electronic patch are connected with the conductive paste and encapsulated with PDMS. (C) The sensor array is modified with urea/ $\text{NH}_4^+$  or glucose/pH sensing films and the BFC electrodes are assembled on the PPES. (D) Photograph of a fully packaged PPES.



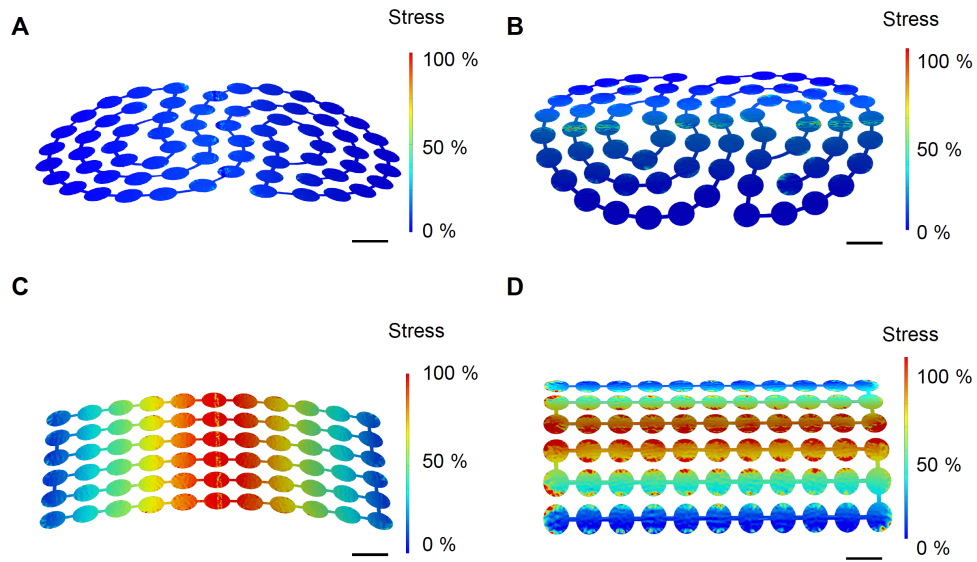

**Fig. S15. Mechanical deformation study of the BFC patch.** Numerical simulation of stress distributions of the BFC array with serpentine design (**A** and **B**) and the straight-line design (**C** and **D**) under mechanical deformation (0.05% strains). Scale bars, 3 mm.

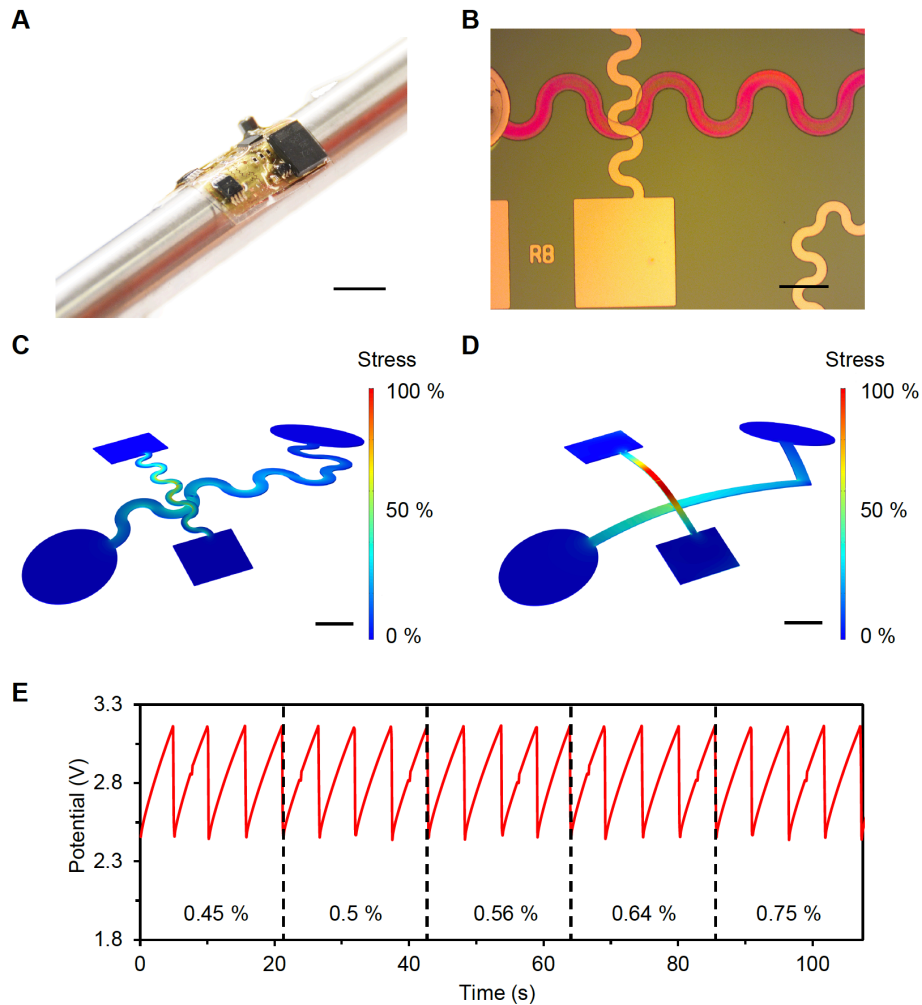

**Fig. S16. Mechanical deformation study of the electronic patch.** (A) Photograph of a soft electronic patch of the PPES under mechanical deformation. Scale bar, 1 cm. (B) Photograph of typical interconnect patterns on the electronic patch. (C and D) Numerical simulation of stress distributions of the wavy cross structure (C) and the straight line structure (D) under mechanical deformation (0.05% strain). Scale bars, 0.3 mm. (E) Dynamics of the capacitor potential under strains between 0.45 % and 0.75 % with constant power supply (input signal, 0.5 V and 2 mA).

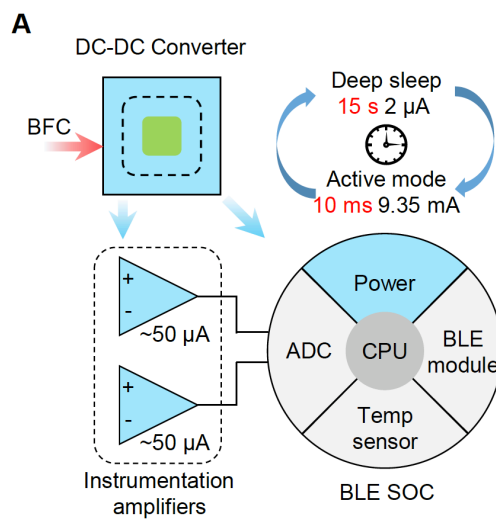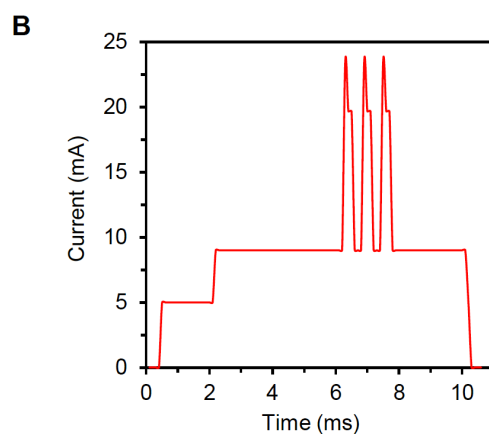

**Fig. S17. Power consumption breakdown of the PPES. (A)** Power consumption of the PPES. **(B)** Power consumption of the PSoC module during the wake-up operation. Operation potential, 3.3 V.

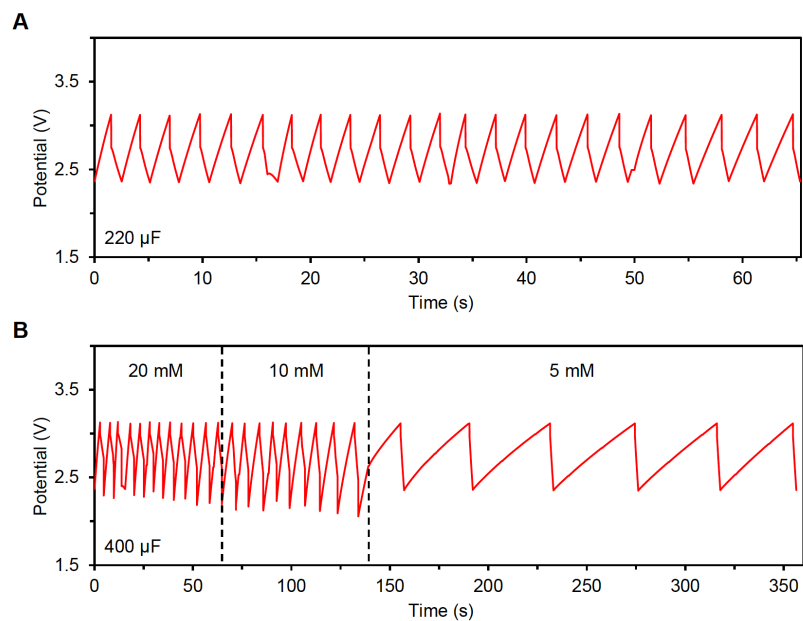

**Fig. S18. Continuous operation of the PPES with small capacitors in 5 to 20 mM lactate. (A)** Real-time capacitor potential of the PPES measured during continuous operation in 20 mM lactate. Capacitor, 220  $\mu\text{F}$ . **(B)** Real-time capacitor potential of the PPES measured during continuous operation in 20, 10, and 5 mM lactate. Capacitor, 400  $\mu\text{F}$ .

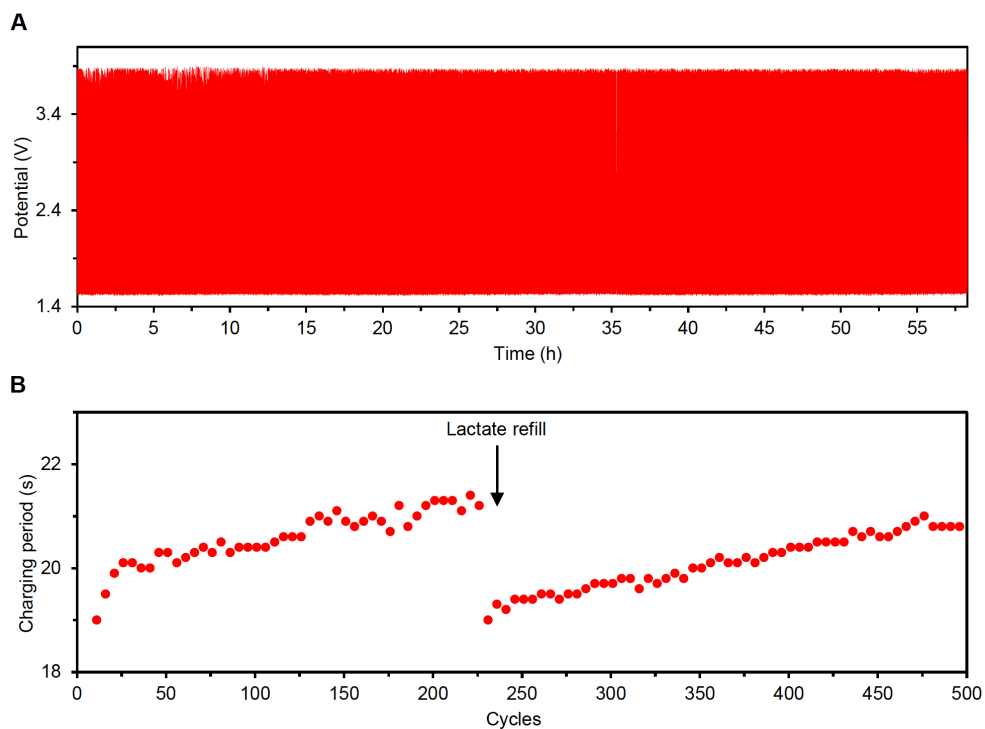

**Fig. S19. Long-term stability of the BFCs to charge a capacitor.** (A) Performance of the BFCs for charging a capacitor ( $220 \mu\text{F}$ ) for nearly 60 hours in a 20 mM lactate solution. (B) The period to charge the capacitor ( $220 \mu\text{F}$ ) from 1.8 to 3.8 V. Fresh 20 mM lactate fuel was filled after 220th cycle.

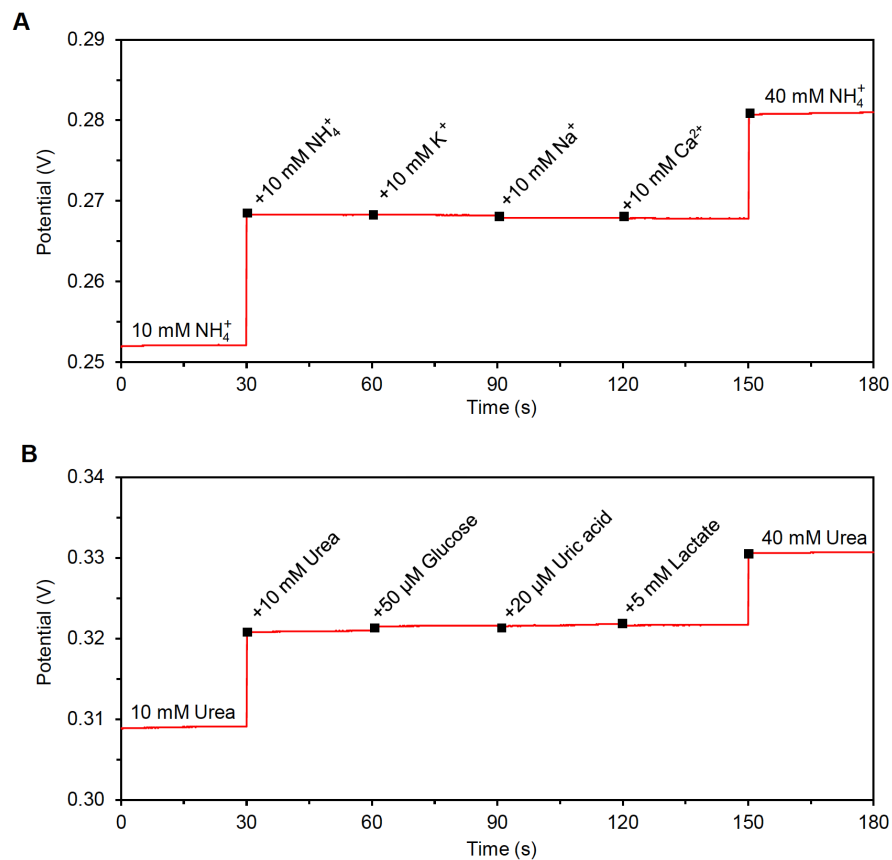

**Fig. S20. Selectivity of the sensor arrays.** (A and B) Selectivity of the NH<sub>4</sub><sup>+</sup> (A) and urea (B) sensors. Data recording was paused for 30 s for each solution change. Experiments were repeated three times independently with similar results.

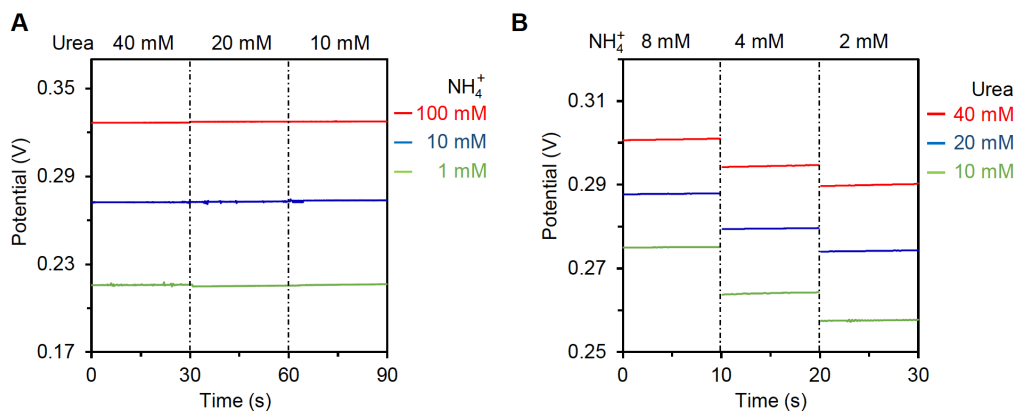

**Fig. S21. Interactive study of the urea/ $\text{NH}_4^+$  sensor array.** (A and B) OCP curves of an  $\text{NH}_4^+$  sensor (A) and a urea sensor (B) under various concentrations of urea and  $\text{NH}_4^+$ . Data recording was paused for 30 s for each solution change. Experiments were repeated three times independently with similar results.

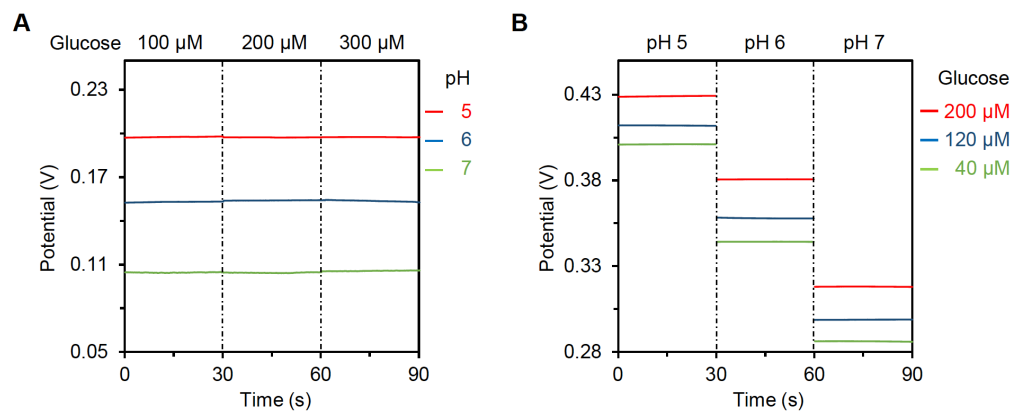

**Fig. S22. Interactive study of the glucose/pH sensor array.** (A and B) OCP curves of a pH sensor (A) and a glucose sensor (B) under various concentrations of glucose and different pHs. Experiments were repeated three times independently with similar results.



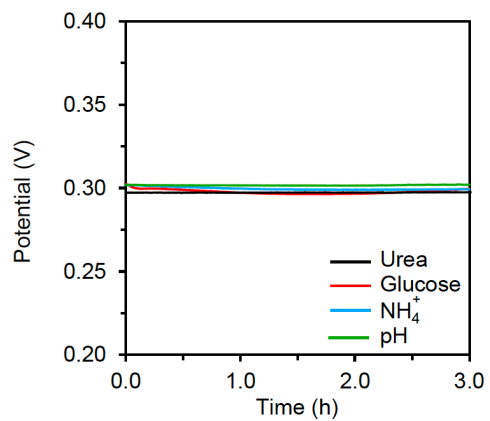

**Fig. S23. Stability of the sensor arrays.** Long-term stability of the urea (black), glucose (red), NH<sub>4</sub><sup>+</sup> (blue) and pH (green) sensors in 20 mM urea, 100 μM glucose, and 10 mM NH<sub>4</sub><sup>+</sup>, respectively. Experiments were repeated three times independently with similar results.

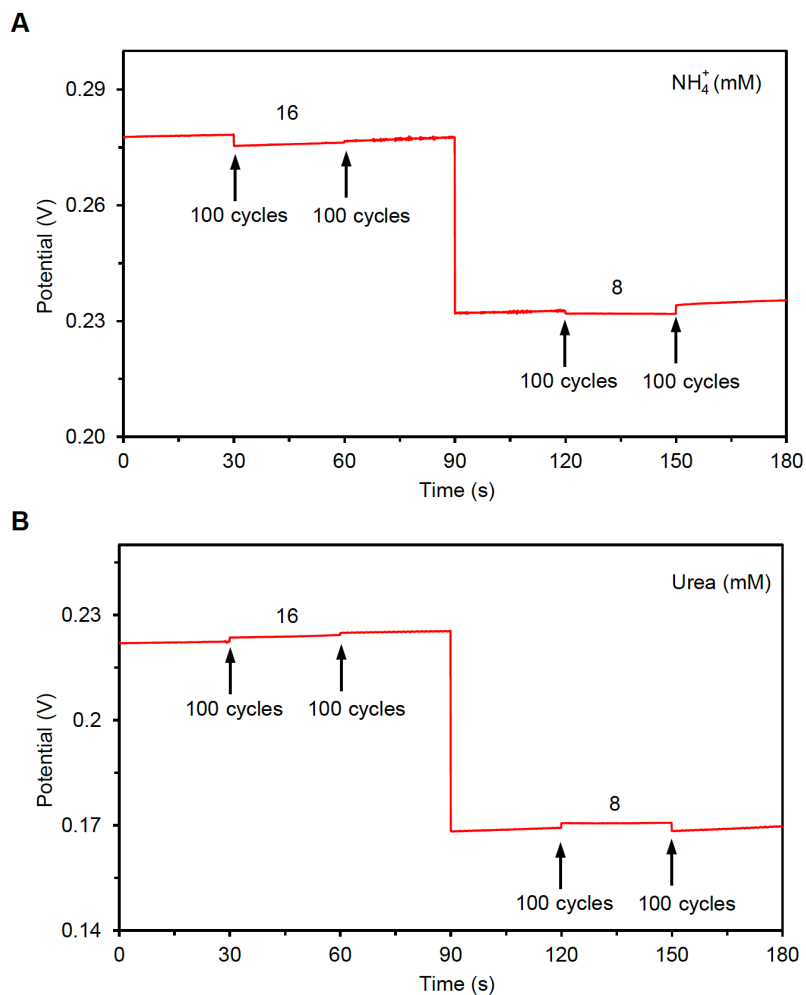

**Fig. S24. Performance of the sensor arrays under mechanical deformation. (A and B)** Performance of an  $\text{NH}_4^+$  sensor (A) and a urea sensor (B) after 0, 100 and 200 cycles of bending (radius of bending curvature, 4 cm). Experiments were repeated three times independently with similar results.

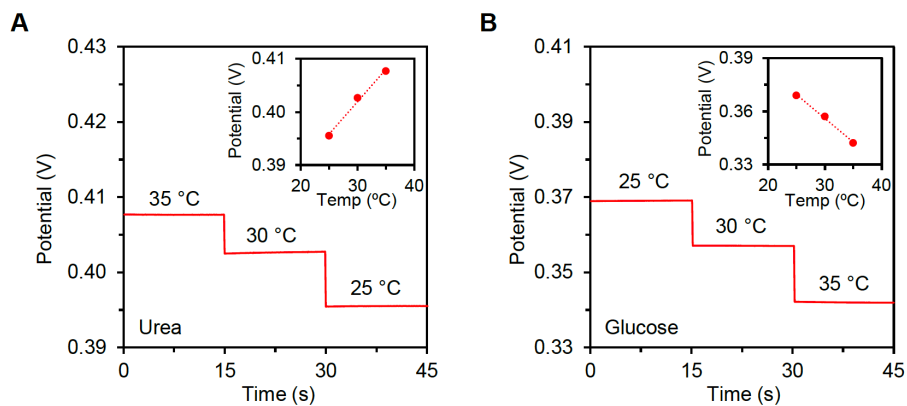

**Fig. S25. Influence of the temperature on the performance of enzymatic sensors.** (A and B) OCP responses of a urea sensor (A) and a glucose sensor (B) under different temperatures in the presence of 10 mM urea and 100  $\mu$ M glucose, respectively. Insets, the corresponding calibration plots of the glucose and urea sensors under different temperatures. Sensor readings were paused during the temperature change. Experiments were repeated three times independently with similar results.

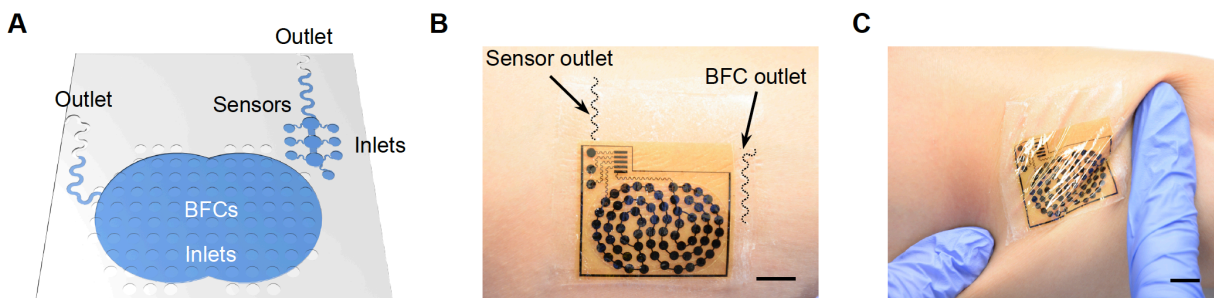

**Fig. S26. Skin-interfaced microfluidic patch in the PPES.** (A) Schematic illustration of the microfluidic design of the PPES. (B and C) Photographs of a skin-interfaced microfluidic electrochemical patch on a human subject's arm. Scale bars, 1 cm.

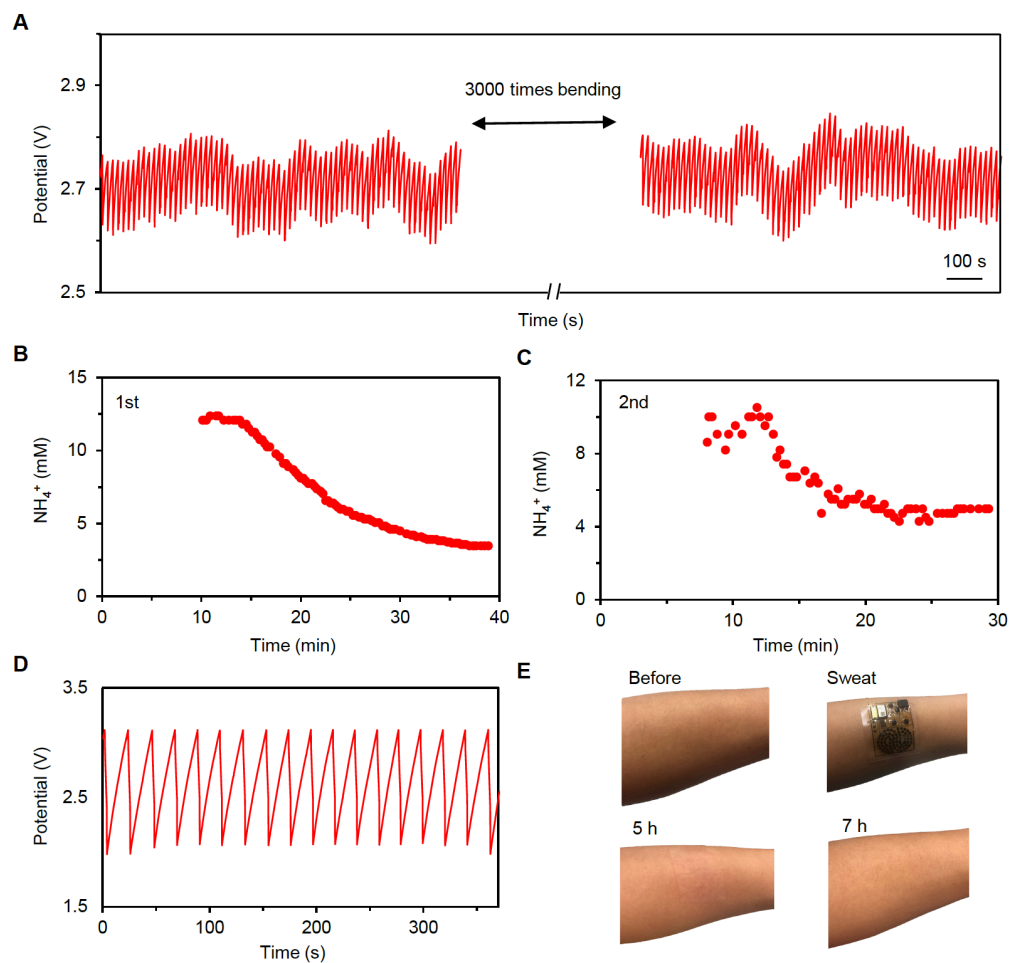

**Fig. S27. Investigation of the stability, reusability, and biocompatibility of the PPES.** (A) The charging performance of the PPES (680  $\mu\text{F}$  capacitor) in 20 mM lactate before and after 3000 times bending cycles (radius of bending curvature: 1.5 cm). (B and C) Repeating use of a PPES for sweat  $\text{NH}_4^+$  analysis on a subject's forehead during the same day. The PPES patch was peel off from the skin after the first cycling test; 4 hours later, the patch was reattached on the skin for the second cycling test. (D) Real-time capacitor potential of the PPES charged by the BFC array in a 20 mM lactate after one-month storage at 4  $^\circ\text{C}$ . (E) The biocompatibility test of the PPES. The PPES was worn by a healthy subject for 5 h involving a 40-min cycling exercise in the first hour.

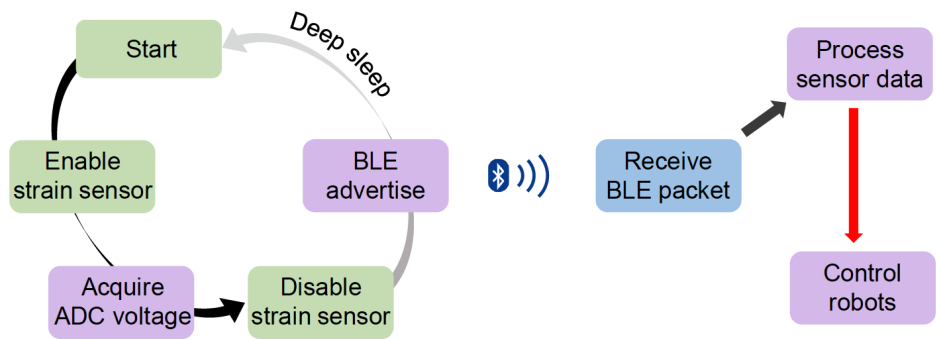

**Fig. S28. Operation flow of data transmission processes and human-machine interaction.**

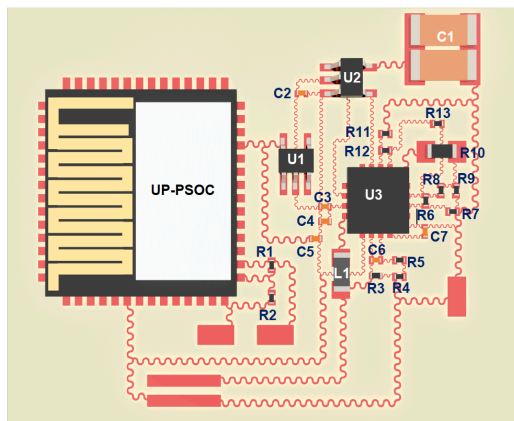

#### The list of the components

| Components | Description            | Value and series number |
|------------|------------------------|-------------------------|
| UP-PSOC    | EZ-BLE™ Creator Module | CYBLE-214009-00         |
| U1         | Voltage Regulators     | TPS71721                |
| U2         | Analogue Switch        | MAX4715EXK+T            |
| U3         | Boost Converter        | BQ25504                 |
| L1         | Fixed Inductors        | MLZ1608                 |
| C1         | 0402 Capacitor         | 220 $\mu$ F*2           |
| C2         | 0202 Capacitor         | 0.1 $\mu$ F             |
| C3         | 0202 Capacitor         | 4.7 $\mu$ F             |
| C4         | 0202 Capacitor         | 0.1 $\mu$ F             |
| C5         | 0202 Capacitor         | 0.1 $\mu$ F             |
| C6         | 0202 Capacitor         | 4.7 $\mu$ F             |
| C7         | 0202 Capacitor         | 0.1 $\mu$ F             |
| R1         | 0202 Resistor          | 200 k $\Omega$          |
| R2         | 0202 Resistor          | 200 k $\Omega$          |
| R3         | 0202 Resistor          | 10 M $\Omega$           |
| R4         | 0202 Resistor          | 4.99 M $\Omega$         |
| R5         | 0202 Resistor          | 4.99 M $\Omega$         |
| R6         | 0202 Resistor          | 4.32 M $\Omega$         |
| R7         | 0202 Resistor          | 5.6 M $\Omega$          |
| R8         | 0202 Resistor          | 3.6 M $\Omega$          |
| R9         | 0202 Resistor          | 6.2 M $\Omega$          |
| R10        | 0402 Resistor          | 0 $\Omega$              |
| R11        | 0202 Resistor          | 4.02 M $\Omega$         |
| R12        | 0202 Resistor          | 3 M $\Omega$            |
| R13        | 0202 Resistor          | 3 M $\Omega$            |

**Fig. S29. Schematic illustration and component list of the strain sensor integrated PPES for human-machine interaction.**

### **Text S1. Mechanism of TTF-MDB bimediator in BFC.**

TTF and MDB can act as electron-transfer relay systems between bioanode and the flavin adenine dinucleotide (FAD)/FADH (the redox active centers of lactate oxidase protected by the protein shell). Generally, L-lactate is oxidized by the FAD of LOx, generating the reduced form LOx(FADH) as the following process:

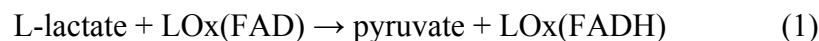

Then, the LOx(FADH) is oxidized by the TTF/MDB mediator:

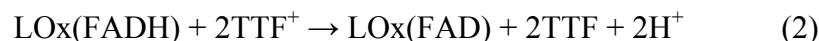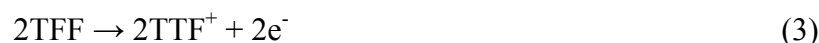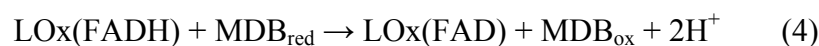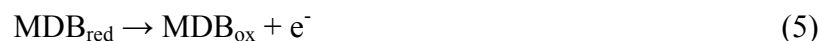

Electrons transfer from the mediators to the bioelectrode as shown in equation (3) and (5).

Without the additional mediator, the O<sub>2</sub> would be the oxidizer for the reduced LOx(FADH):

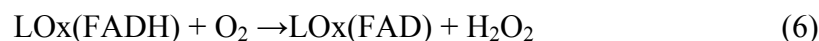

At low potential, the electron transfer rate between the generated H<sub>2</sub>O<sub>2</sub> and the carbon-based electrode is very low (H<sub>2</sub>O<sub>2</sub> oxidation requires a high voltage). Instead, the onset potential of the MDB and TTF are -0.2 and 0 V, respectively (as shown in Fig. 2D). Here, bioanode mixed with TTF and MDB has higher current and lower onset potential than either of single mediator.



**Table S1. List of BFCs for energy-harvesting in body fluids.**

| No. | Bioanode                           | Cathode               | Biofluid | Biofuel | Power output               | OCP (V) | Reference |
|-----|------------------------------------|-----------------------|----------|---------|----------------------------|---------|-----------|
| 1   | Pyranose dehydrogenase/graphite    | BOx/AuNPs/Au          | Blood    | Glucose | 73 $\mu\text{W cm}^{-2}$   | 0.56    | 49        |
| 2   | LDH/buckypaper                     | BOx/buckypaper        | Tear     | Lactate | 8.14 $\mu\text{W cm}^{-2}$ | 0.41    | 50        |
|     |                                    |                       | Sweat    |         | 0.26 $\mu\text{W cm}^{-2}$ | 0.58    | 51        |
| 3   | Cellobiose dehydrogenase/Au NPs/Au | BOx/AuNPs/Au          | Saliva   | Glucose | 0.2 $\mu\text{W cm}^{-2}$  | 0.56    |           |
|     |                                    |                       | Tear     |         | 1 $\mu\text{W cm}^{-2}$    | 0.57    | 52        |
| 4   | LOx/NQ-CNT                         | CNT-Ag <sub>2</sub> O | Sweat    | Lactate | 1.1 $\text{mW cm}^{-2}$    | 0.5     | 32        |
| 5   | CNT/TTF/LOx/chitosan               | Platinum black        | Sweat    | Lactate | 44 $\mu\text{W cm}^{-2}$   | 0.5 *   | 34        |
| 6   | LOx/TTF·TCNQ/CNT                   | Platinum black        | Sweat    | Lactate | 100 $\mu\text{W cm}^{-2}$  | 0.67    | 53        |
| 7   | LOx/TTF-MDB-CNT/rGO/h-Ni           | Pt-Co/MDB-CNT         | Sweat    | Lactate | 3.5 $\text{mW cm}^{-2}$    | 0.65    | This work |

BOx, bilirubin oxidase; LDH, lactate dehydrogenase; NPs, nanoparticles; NQ, 1,4-naphthoquinone; TCNQ, tetracyanoquinodimethane; OCP, open circuit potential.

Physiological range of the biofuels: Glucose: blood, 4.4-7.8 mM; saliva, 0.02-0.06 mM; tear, 0.2-0.9 mM. Lactate: sweat, 5-60 mM.

\*Acquired from provided figure.
